# Supplementary material for: A mechanism of stratospheric O 3 intrusion into the atmospheric environment: a case study of the North China Plain
Source: Copernicus journal article supplement (doi:10.5194/acp-24-7013-2024), 2024-06-18
Supplement: Supplementary file 1 [file acp-24-7013-2024-supplement.pdf]

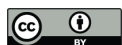

*Supplement of*

## **A mechanism of stratospheric O<sub>3</sub> intrusion into the atmospheric environment: a case study of the North China Plain**

**Yuehan Luo et al.**

*Correspondence to:* Tianliang Zhao (tlzhao@nuist.edu.cn)

The copyright of individual parts of the supplement might differ from the article licence.

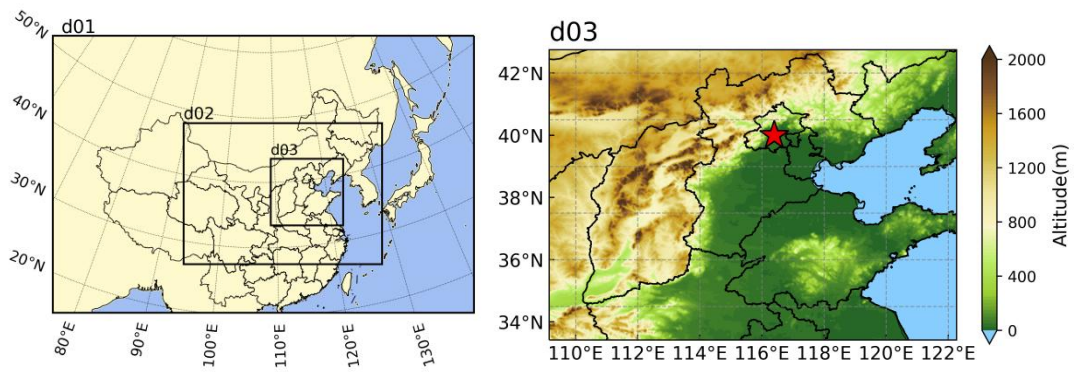

**Figure S1:** The spatial distributions of three nesting domains d01, d02 and d03 with terrain altitude (m in a.s.l.). The red star represents the capital of China, Beijing.

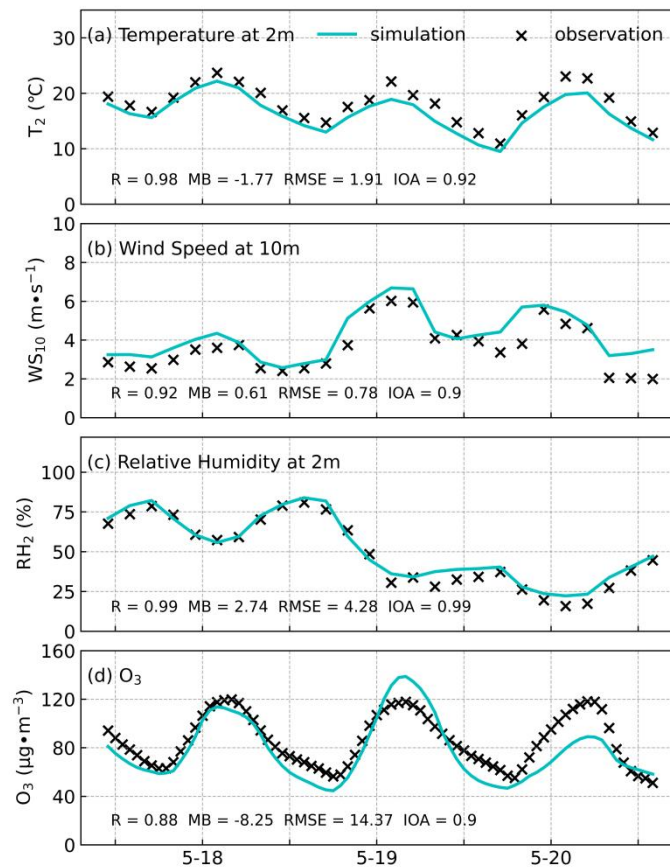

**Figure S2:** Hourly changes of simulated and observed meteorological elements and near-surface  $\text{O}_3$  concentrations during May 18–20, 2019 averaged over North China.

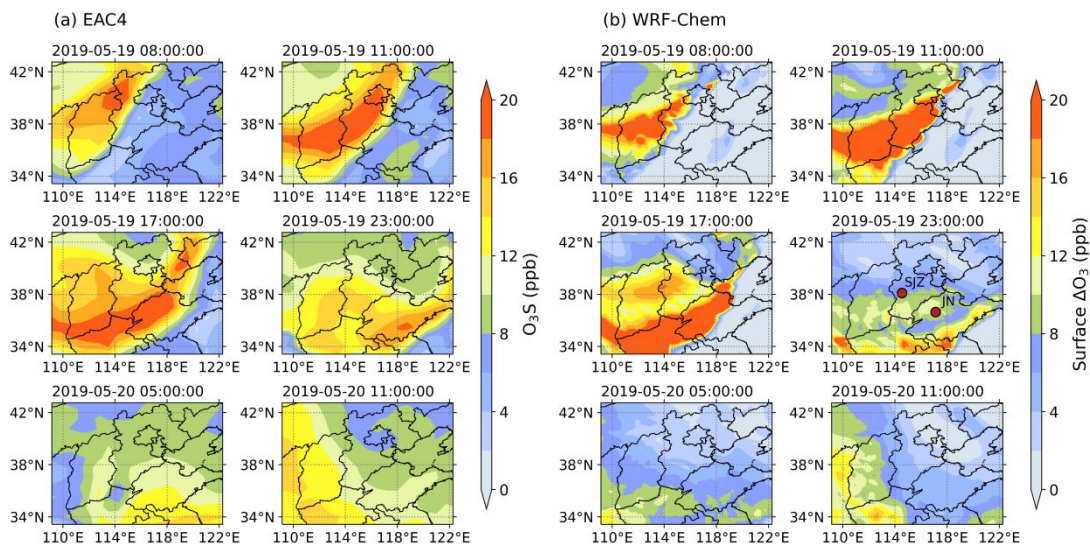

**Figure S3: Spatial distribution of (a) the surface  $O_3S$  derived from EAC4 data and (b) the differences of surface  $O_3$  between  $CASE_{STRO3}$  and  $CASE_{noSTRO3}$  simulations of WRF-Chem over the NCP. The red dots in (b) indicate the geographical location of the representative sites SJZ and JN in the NCP.**

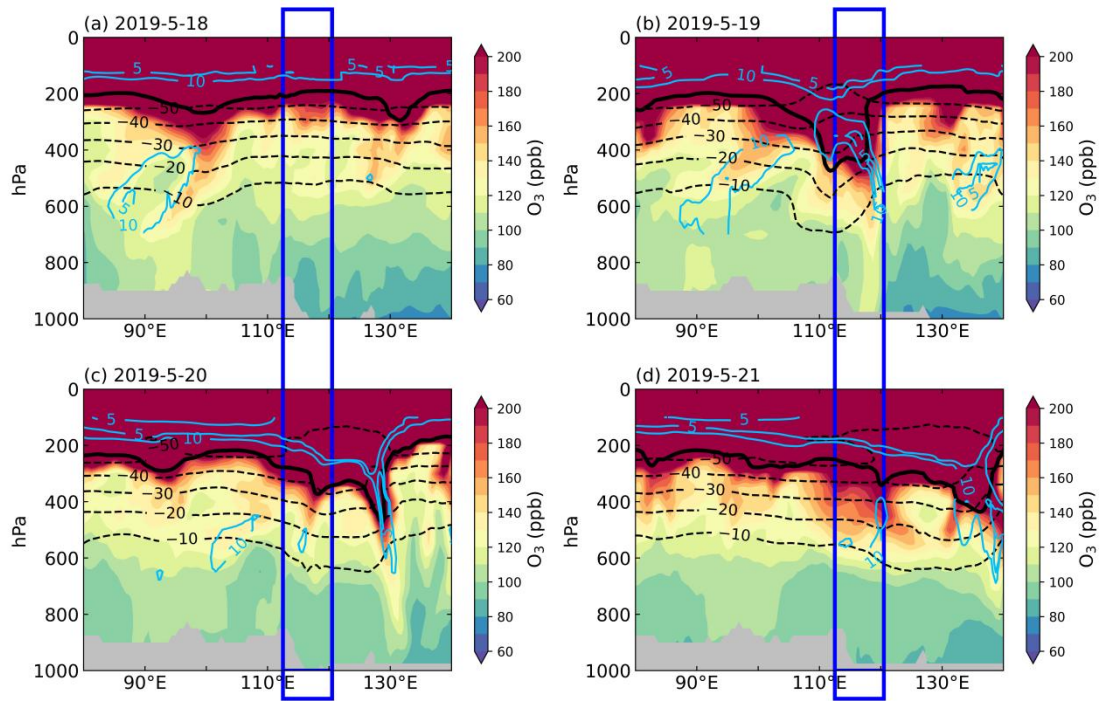

**Figure S4: Latitudinal vertical sections of O<sub>3</sub> concentrations (color contours) averaged over 32 °N–40 °N from the MERRA2 data during May 18–21, 2019. Black solid lines indicate the dynamical tropopause labeled by PV=2. The dashed black lines represent air temperature (°C), the solid blue lines represent relative humidity (%), and the blue rectangles mark the NCP region.**



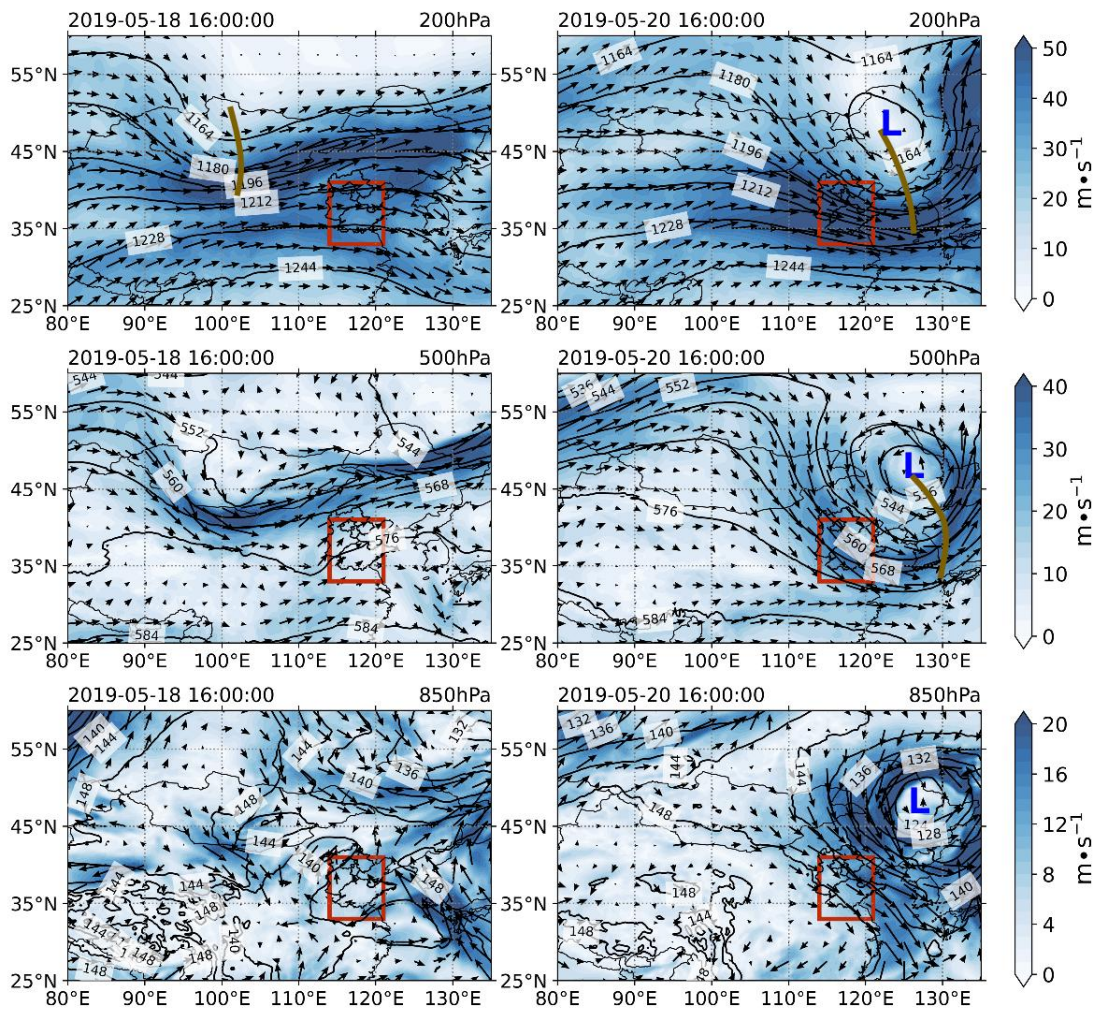

**Figure S5: Atmospheric circulation patterns of horizontal wind vectors at 200 hPa, 500 hPa, and 850 hPa at 16:00 LST on May 18 and 20, 2019. The shaded colors and black arrows denote the horizontal wind speed ( $\text{m}\cdot\text{s}^{-1}$ ), and the black contour lines denote the geopotential height (gpdm). The red solid boxes indicate the scope of the NCP region.**

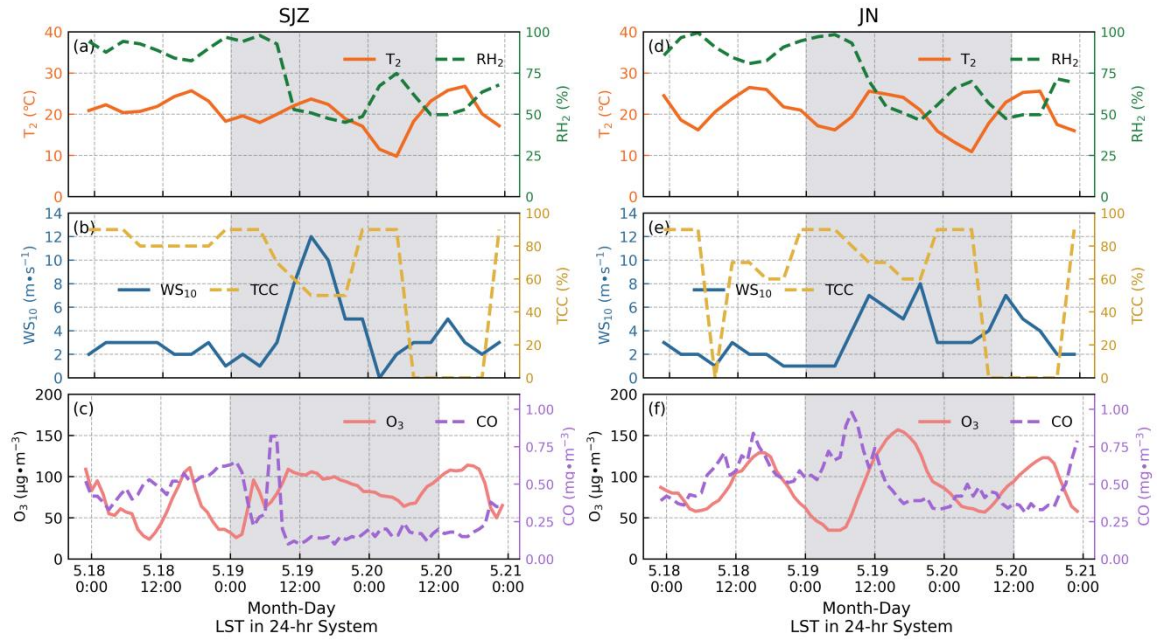

**Figure S6: Hourly variations of (a, d)  $T_2$ ,  $RH_2$ , (b, e)  $WS_{10}$ , and total cloud cover (TCC), (c, f) near-surface  $O_3$  and CO concentrations in representative cities SJZ and JN from the observations in the NCP region. The shaded areas mark the periods of the SI to the near-surface layer.**

**Table S1: Physical and chemical parameterization schemes used in the WRF-Chem simulations.**

| Process          | Parameters          | WRF-Chem options                |
|------------------|---------------------|---------------------------------|
| Physical process | Microphysics        | Lin scheme                      |
|                  | Longwave radiation  | RRTM scheme                     |
|                  | Shortwave radiation | Goddard scheme                  |
|                  | Boundary layer      | YSU scheme                      |
|                  | Land surface        | unified Noah land-surface model |
|                  | Surface layer       | MM5 similarity scheme           |
| Chemical process | Cumulus             | Grell 3D ensemble scheme        |
|                  | Gas-phase chemistry | CBMZ                            |
|                  | Aerosol module      | MOSAIC_8bins                    |
